# Supplementary figures and images for: Human neuroblastoma cells with acquired resistance to the p53 activator RITA retain functional p53 and sensitivity to other p53 activating agents
Source: PubMed Central journal article supplement — Cell Death Dis. 2012 Apr 5;3(4):e294–. doi: 10.1038/cddis.2012.35 (PMC3358013; doi:10.1038/cddis.2012.35), 2012-04-05

## Suppl. Figure 1

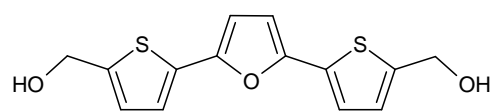

RITA

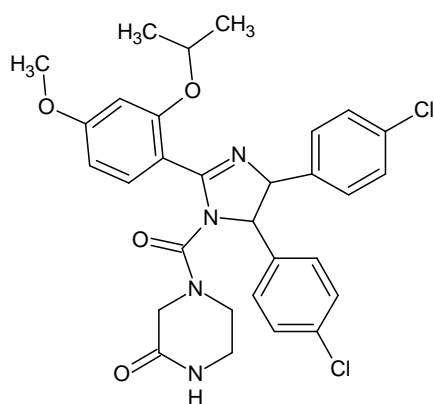

nutlin-3

**Suppl. Figure 1.** Chemical structures of RITA and nutlin-3

Supplement: cddis201235x1.pdf [file cddis201235x1.pdf]
